## 1 **Low rate of index hopping on the Illumina HiSeq X platform**

2 *Tom van der Valk<sup>1</sup>, Francesco Vezzi<sup>2</sup>, Mattias Ormestad<sup>2</sup>, Love Dalén<sup>3\*</sup>, Katerina Guschanski<sup>1\*</sup>*

3 <sup>1</sup>Animal Ecology, Department of Ecology and Genetics, Evolutionary Biology Centre, Uppsala  
4 University, Norbyvägen 18D, 752 36, Uppsala, Sweden

5 <sup>2</sup>Science for Life Laboratory, Tomtebodavägen 23A, 17165 Solna, Sweden

6 <sup>3</sup>Department of Bioinformatics and Genetics, Swedish Museum of Natural History, SE-10405  
7 Stockholm, Sweden

8 \* These authors contributed equally

9 Keywords: Read misassignment, index hopping, inline barcodes, historical samples, ancient DNA

## 10 **Abstract**

11 The high throughput capacities of the Illumina sequencing platforms and the possibility to label  
12 samples with unique identifiers has encouraged a wide use of sample multiplexing. However, this  
13 practice results in low rates of read misassignment (<1%) across samples sequenced on the same lane  
14 on all Illumina sequencing platforms that rely on the traditional bridge amplification. Alarming high  
15 rates of read misassignment of up to 10% were recently reported for the newest Illumina machines  
16 (HiSeq X and HiSeq 4000). This potentially calls into question previously generated and published  
17 results and may make future use of these platforms prohibitive for many applications in biology and  
18 medicine. In this study we rely on inline barcodes that are ligated to both ends of the DNA insert, to  
19 directly quantify the amount of index hopping in historical museum-preserved samples. As the  
20 barcodes become part of the sequencing read, they allow us to reliably infer the read origin even in  
21 the presence of index hopping. After sequencing the same pooled library of seven samples on three  
22 independent HiSeq X lanes and accounting for multiple possible sources of error, including barcode  
23 and index cross-contamination, we identified on average only 0.470% hopped reads. We conclude that  
24 index hopping happens on the newest generation of Illumina sequencing platforms, but results in a

25 similar rate of read missignment as reported for older Illumina machines. We nonetheless recommend  
26 using inline barcodes in multiplexing studies that rely on low-coverage data, require absolute certainty  
27 and/or aim to characterize rare variants.

28

## 29 **Introduction**

30 Multiplexing samples for next-generation sequencing is a common practice in many biological and  
31 medical applications (Craig et al. 2008; Meyer and Kircher 2010; Smith et al. 2010; Caporaso et al. 2012;  
32 Rohland and Reich 2012). The high throughput capacities of most sequencing platforms clearly  
33 encourage multiplexing and optimized sequencing protocols with greater data output are continuously  
34 being developed. During multiplexing, samples are individually labelled with unique identifiers  
35 (indices) that are frequently embedded within one or both sequencing platform-specific adapters and  
36 are separated from the actual template (Meyer and Kircher 2010; Kircher et al. 2012, TruSeq Nano  
37 DNA kit (Illumina), NEBNext Ultra DNA kit (New England Biolabs)). The samples are subsequently  
38 pooled into a single sequencing library and sequenced on the same lane. Following sequencing,  
39 computational demultiplexing based on the sample-specific indices allows for assignment of the  
40 sequenced reads to the respective sample of origin. However, ever since multiplexing approaches were  
41 introduced, low rates of read misassignment across samples sequenced on the same lane were  
42 reported on all Illumina platforms (Kircher et al. 2012; Nelson et al. 2014; D'Amore et al. 2016; Wright  
43 and Vetsigian 2016b), the most frequently used next generation sequencing technology (Research &  
44 Markets 2017). This process results in reads from one sample carrying a wrong index and  
45 consequentially being erroneously attributed to the wrong original sample. The reported rate of read  
46 misassignment is low (<1%) on Illumina platforms that rely on the traditional bridge amplification for  
47 cluster generation (Illumina Inc. 2017) and therefore this source of error has been readily ignored.

48

49 The use of the exclusion amplification chemistry (ExAmp) in combination with patterned flow cells on  
50 the newest generation of the Illumina sequencing platforms (HiSeq X and HiSeq 4000) was an  
51 important improvement, as it significantly increased data throughput and lowered sequencing cost  
52 (Illumina Inc. 2017). However, recently reported high rates of read misassignment of up to 10%  
53 observed for single cell RNA libraries sequenced on the Illumina HiSeq 4000 platform (Griffiths et al.

54 2017; Sinha et al. 2017) have shaken the scientific community, potentially calling into question many  
55 generated and published results. This finding is particularly worrying in light of the recently introduced  
56 NovaSeq sequencing platform, which offers even higher throughput while relying on the same  
57 technology as HiSeq X and HiSeq 4000. As even more samples can be multiplexed on a single lane, the  
58 potential bias from read misassignment would be further increased.

59

60 Several different processes can lead to read misassignment, i.e. presence of reads with a switched index.  
61 The effect of sequencing errors that can convert one index sequence into another is well known and  
62 has led to series of recommendations for designing highly distinct indices (e.g. Meyer and Kircher  
63 2010). Jumping PCR during bulk amplification of library molecules that carry different indices can  
64 generate chimeric sequences and should be avoided (Meyerhans et al. 1990; Odelberg et al. 1995; Lahr  
65 and Katz 2009; Holcomb et al. 2014; McDevitt et al. 2016). Similarly, cross-contamination of indexing  
66 adapters during oligonucleotide synthesis or laboratory work can lead to reads being attributed to the  
67 wrong sample of origin. Mixed clusters that can form on the flow cell if colonies from different  
68 template molecules grow into each other during cluster generation were identified as source of  
69 misassigned reads on older Illumina platforms (Kircher et al. 2012). For the Illumina platforms with  
70 patterned flow cells and ExAmp chemistry, read misassignment has been suggested to be caused by the  
71 presence of free-floating indexing primers in the final sequencing library. These primers can anneal to  
72 the pooled library molecules and get extended by DNA polymerase before the rapid exclusion  
73 amplification on the flow cell, creating a new library molecule with a wrong index (Illumina Inc. 2017;  
74 Sinha et al. 2017). We refer to this particular process of generating misassigned reads as index hopping.

75

76 The preprint by Sinha and colleagues (2017) has started an active discussion about the prevalence of  
77 index hopping on the Illumina platforms with ExAmp chemistry. Illumina acknowledged a higher rate  
78 of index hopping on platforms with ExAmp chemistry compared to platforms that rely on bridge

79 amplification for cluster generation, reporting up to 2% compared to  $\leq 1\%$  read misassignment  
80 (Illumina Inc. 2017). However, another study found no evidence for index hopping neither on HiSeq X  
81 nor on HiSeq 2500 platforms (Owens et al. 2017). Rigorously removing free-floating primers and  
82 adapters during library preparation by means of size-specific library clean-up was suggested to be the  
83 most efficient way to avoid index hopping (Illumina Inc. 2017; Griffiths et al. 2017; Sinha et al. 2017).

84

85 Due to the conflicting reports, the prevalence and severity of index hopping on Illumina HiSeq X and  
86 HiSeq 4000 platforms remain unclear. This is partly due to the difficulties to reliably identify  
87 missassigned reads in sequencing experiments, particularly if pooling similar samples types (e.g.  
88 multiple individuals from the same population that have high sequence similarity). However, some  
89 research questions clearly require high confidence in read identity, as presence of rare sequence  
90 variants can influence biological and medical conclusions. For instance, detection of low abundance  
91 transcripts or rare mutations can influence diagnostic inferences (Greenman et al. 2007; Schmitt et al.  
92 2012; Flaherty et al. 2012; Trapnell et al. 2013). Studies with low input DNA quantities are particularly  
93 susceptible to such errors. Besides single cell RNA sequencing, these include ancient and historical  
94 samples (Kircher et al. 2012). Similarly, population genomics studies frequently rely on low-coverage  
95 genomic data, and presence of shared rare alleles across several populations or species can be  
96 interpreted as evidence for gene flow (Green et al. 2010; Nielsen et al. 2012; Fumagalli et al. 2013;  
97 Allentoft et al. 2015; Wall et al. 2016; Therkildsen and Palumbi 2017).

98

99 In this study we make use of inline barcodes, short unique 7-bp sequences ligated to both ends of the  
100 DNA fragments (Rohland and Reich 2012), in combination with indexed primers that subsequently  
101 were used to amplify the libraries. This enabled us to directly quantify the amount of index hopping in  
102 historical museum-preserved samples. These barcodes become part of the sequencing read and thus  
103 allow for identification of the read origin, even in the presence of index hopping. Historical samples

104 are characterized by low DNA quantity and quality (the DNA is degraded, chemically modified and  
105 shows single-strand overhangs (Mulligan 2005; Sawyer et al. 2012)). We purposefully use this low-  
106 quality sample source, as it has been suggested that libraries constructed from difficult samples may  
107 be more prone to index hopping than libraries constructed from high-quality and high-quantity  
108 samples (Froenicke, 2017). Following sequencing on the HiSeq X platform, we identified a small  
109 fraction of reads (<1%) with a wrong combination of barcodes and indices. After excluding several  
110 possible explanations, we conclude that index hopping likely happens in this system, but results in a  
111 similar rate of read misassignment as reported for older versions of Illumina sequencing platforms.  
112 After demonstrating how the use of inline barcode-containing sequencing adapters enables detection  
113 and removal of falsely indexed reads, we recommend using this approach independent of the  
114 sequencing platform in studies that rely on low-coverage data, require absolute certainty and/or aim  
115 to characterize rare variants.

## 116 **Methods**

### 117 **Library preparation and sequencing**

118 DNA extracts from seven historical eastern gorilla samples that previously yielded good sequencing  
119 results on the Illumina HiSeq 2500 platform and showed high endogenous content were turned into  
120 sequencing libraries following the strategy outlined in Rohland and Reich (2012) and Rohland et al.  
121 (2015), as detailed below. All library preparation steps except indexing PCR were performed in a  
122 dedicated ancient DNA facility to minimize contamination. Briefly, 20  $\mu$ l DNA extract was used in a 50  
123  $\mu$ l blunting reaction together with USER enzyme treatment to remove uracil bases resulting from aDNA  
124 damage (final concentrations: 1 $\times$  buffer Tango, 100  $\mu$ M each dNTP, 1 mM ATP, 25 U T4 polynucleotide  
125 kinase (Thermo Scientific) 3U USER enzyme (NEB)). Samples were incubated for 3 h at 37°C, followed  
126 by the addition of 1  $\mu$ l T4 DNA polymerase (Thermo Scientific) and incubation at 25°C for 15 min and  
127 12°C for 5 min (Fig. 1). DNA fragment within each sample were then ligated to a unique combination  
128 of incomplete, partially double-stranded P5- and P7-adapters (10  $\mu$ M each), each containing a unique  
129 seven base pair sequence. We refer to these as the P5 and P7 barcodes from here on. All barcode  
130 sequences were at least three nucleotides apart from each other to ensure high certainty during  
131 demultiplexing and avoid converting one barcode into another through sequencing error (Rohland et  
132 al. 2015, Table S1). To increase the complexity of the pooled sequencing library, one sample received  
133 two different barcode combinations (Table 1). Adapter ligation was performed in 40  $\mu$ l volume using  
134 20  $\mu$ l of blunted DNA and 1  $\mu$ l of unique P5 and P7 barcodes per sample (final concentrations: 1 $\times$  T4  
135 DNA ligase buffer, 5% PEG-4000, 5 U T4 DNA ligase (Thermo Scientific), Fig. 1). Samples were incubated  
136 for 30 minutes at room temperature and cleaned using MinElute spin columns following the  
137 manufacturer's protocol. Adapter fill-in was performed in 40  $\mu$ l final volume using 20  $\mu$ l adapter ligated  
138 DNA (final concentrations: 1 $\times$  T4 DNA ligase buffer, 5% PEG-4000, 5 U T4 DNA ligase (Thermo  
139 Scientific), Fig. 1), incubated at 37°C for 20 minutes, heat-inactivated at 80°C for 20 minutes, and  
140 cleaned using MinElute spin columns as above.

141 Indexing PCR was performed for 10 cycles in 125  $\mu$ l volume using a unique P7 indexing primer for each  
142 sample, as in Meyer & Kircher (2010) (final concentrations: 1x AccuPrime reaction mix, 0.3 $\mu$ M IS4  
143 primer, 0.3 $\mu$ M P7 indexing primer, 7 U AccuPrime Pfx (Thermo Scientific), cycling protocol: 95°C for 2  
144 min, 30 cycles at 95°C for 30 s, 55°C for 30 s and 72°C for 1 min and a final extension at 72°C for 5  
145 minutes, Fig. 1). Note that indexing PCR for sample 7 that received two different barcode pairs was  
146 performed in a single reaction combining both fractions of this sample. All index sequences differed  
147 by at least three base pairs from each other (Table S1). Following the indexing PCR, each DNA fragment  
148 contained three unique identifiers: the P5 and P7 barcodes directly ligated to the ends of the DNA  
149 fragments, and the P7 index which is part of the Illumina sequencing adapter (Fig. 1). Sample libraries  
150 were cleaned using MinElute spin columns, fragment length distribution and concentrations were  
151 measured on the Bioanalyzer. We then pooled all seven sample libraries in a ratio of 2:1:2:1:1:1:2 for  
152 samples 1 to 7 and performed two rounds of AMPure XP bead clean-up using 0.5X and 1.8X bead:DNA  
153 ratio, respectively. We confirmed that indexing primers were successfully removed during clean-up by  
154 running the final library on a Bioanalyzer (Fig. S1). The pooled library with final concentration of 18mM  
155 was sequenced on three HiSeq X lanes (150 bp paired-end, 1% PhiX) that were part of independent  
156 runs, at the SciLife sequencing facility in Stockholm.



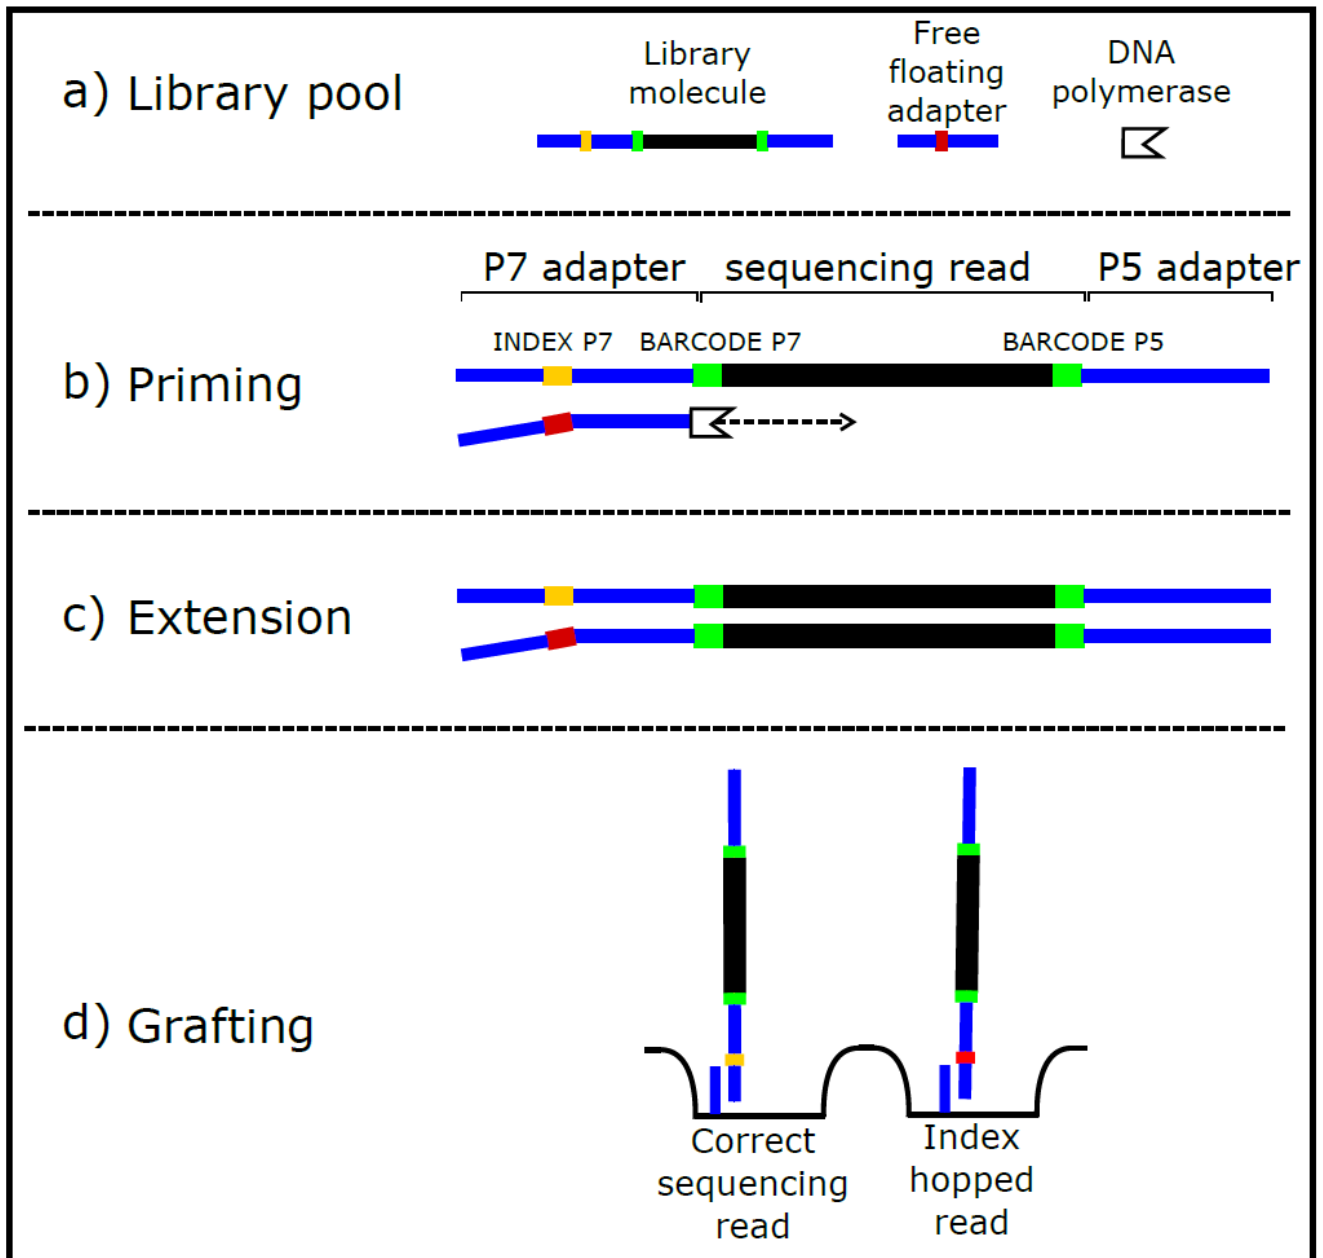

157

158 *Figure 1: Outcome of index hopping. A) The library pool, containing barcoded and indexed library*  
159 *molecules and free-floating indexing primers, is mixed with ExAmp reagents before loading on the*  
160 *patterned flow cell. B) Free-floating adapters anneal to the adapter sequence of a library molecule and*  
161 *C) the library molecule subsequently gets extended by DNA polymerase forming a new library molecule*  
162 *containing a wrong index. D) The library molecules are denatured, separating the strands, and each*  
163 *library molecule is allowed to graft into a nanowell on the patterned flow cell.*

164

165 **Data processing**

166 All reads were demultiplexed based on their unique indices using Illumina's bcl2fastq (v2.17.1)  
167 software with defaults settings, allowing for one mismatch per index and only retaining "pass filter"  
168 reads (Illumina Inc.). All unidentified reads, i.e. reads with indices that were not used in our  
169 experiment, were subjected to the same filtering steps, as described below. We removed adapter  
170 sequences using AdapterRemoval V2.1.7 using standard parameters and subsequently merged the  
171 reads, requiring a minimal overlap of 11bp and allowing for a 10% sequencing error rate (Schubert et  
172 al. 2016). Unmerged reads and reads below 29 bp were removed leaving only merged reads with an  
173 original insert size of at least 15 bp (7 bp barcodeP7 + 7 bp barcodeP5 + 15 bp DNA fragment = 29 bp).  
174 To increase certainty, we only retained reads with intact and error-free P5 and P7 barcodes (assessed  
175 using an in-house python script) and an average quality score of at least 30 using prinseq V0.20.4  
176 (Schmieder and Edwards 2011).

177

178 **Estimating barcode and index cross-contamination and index hopping across sequencing runs**

179 To estimate the rate of barcode cross-contamination, we identified reads with wrong barcode pairs for  
180 each sample within each run. We also included unidentified reads with wrong barcode pair  
181 combinations into this calculation. The proportion of cross-contaminated reads within a given  
182 sequencing run was determined as the ratio between the sum of all reads with wrong barcode pairs  
183 and the sum of all sequenced reads that passed the filtering criteria. Given that we used a total of eight  
184 different barcodes, we calculated the probability that barcode cross-contamination results in a valid  
185 barcode pair (i.e. barcode pair that is actually used in the experiment) as  $7 \cdot (x/7 \cdot x/7)$ , where  $x$   
186 corresponds to the estimated percentage of wrong barcode pairs present in our experiment.

187

188 Reads with a correct barcode combination but wrong index can result from index cross-contamination  
189 and/or index hopping. To distinguish between these two possibilities, we relied on the fact that only  
190 seven different indices were used in our experiment, whereas 40 different indices are routinely used  
191 in the ancient DNA laboratory. Therefore, we quantified index cross-contamination as the fraction of  
192 reads containing indices that were not included in our experiment. These reads are present within the  
193 unidentified reads and carry a valid barcode combination but an unused index.

194

195 To determine the proportion of hopped reads, for each sequencing run we calculated the ratio  
196 between the sum of all reads showing a wrong index-barcode combination and the sum of all  
197 sequenced reads that passed the filtering criteria. To account for the possibility of barcode cross-  
198 contamination that produces valid barcode combinations and index cross-contamination, we  
199 subtracted these two estimates from the proportion of reads with wrong barcode-index combination.

200

## 201 **Statistical analyses**

202 Statistical analyses were performed in R 2.15.3 (Team R Core 2016). Significant global chi-square tests  
203 were followed by a post hoc procedure as implemented in the R package polytomous  
204 (<https://artax.karlin.mff.cuni.cz/r-help/library/polytomous/html/00Index.html>). The minimum value  
205 of the chi-squared test statistic for the given degrees of freedom was used to assess if individual  
206 observed values differ significantly from an overall hypothetical homogeneous distribution. The test  
207 also identified the direction of these differences.

208 **Results**

209 Our sequencing libraries were made from degraded historical samples containing a large proportion  
210 of short DNA fragments (Fig. 2A), the majority of which could be confidently merged (95.3% SE  $\pm$  1.0%).  
211 After filtering (see Methods), the final dataset contained 89.3%  $\pm$  1.9% of the original sequence reads.

212

213 **Barcode cross-contamination**

214 We observed low levels of barcode cross-contamination (0.0276% SE  $\pm$  0.0026 across all three runs,  
215 Table 1, Table S2). The rate of barcode cross-contamination differed significantly by sample (global chi-  
216 square test,  $P < 10^{-15}$ ). The implemented posthoc procedure suggested that samples 5 and 7 had  
217 significantly more reads with wrong barcode combinations than expected, whereas all the other  
218 samples had significantly fewer such reads. Among reads with barcode cross contamination we found  
219 an overrepresentation of incorrectly paired barcodes #9 and #14 (Figure 3, Table S2), both of which  
220 were used for sample 7 in the following combinations: P5-#9 with P7-#9 and P5-#14 with P7-#14 (Table  
221 1). Elevated cross-contamination between these two barcodes during laboratory procedures could  
222 explain the results. However, the observed high rate of wrong barcode pairs (P5-#9 with P7-#14, P5-  
223 #14 with P7-#9, Figure 3) is more likely the result of jumping PCR during the 10 rounds of indexing PCR,  
224 as both fraction of sample 7 were indexed in a pooled reaction. Equal frequency of wrong barcode  
225 pairs is further supporting this notion (Table S2) and can be explained by jumping PCR happening  
226 randomly among the reads. In contrast, it is rather unlikely that all four barcodes would have received  
227 equal amounts of cross-contamination during laboratory procedures. Assuming that adapter ligation  
228 of barcodes is unbiased with respect to the barcode sequence (Rohland et al. 2015), the detected low  
229 average percentage of cross-contamination will lead to  $1.55 \times 10^{-5}$  % of reads ( $7 \times (0.00276/7 * 0.00276/7)$  \* 100% = 0.0000155%) with a valid barcode pair, but wrongly appear as having undergone  
230 index hopping.  
231

232

233 **Index cross-contamination**

234 The Illumina HiSeq X platform does not support a double-indexing design. Therefore, in contrast to  
235 barcode cross-contamination, index cross-contamination cannot be directly quantified from the  
236 sequencing data. Instead, we focused on the fraction of unidentified reads, which contain indices that  
237 were not used in our experiment (Methods, Table S3). The fraction of such reads was nearly identical  
238 among the three sequencing runs, ranging from 0.12% to 0.13% (mean = 0.124% SE  $\pm$  0.0023).

239

240 **Index hopping**

241 Index hopping will not affect the barcodes that are directly attached to the DNA fragments. Therefore,  
242 it can be readily distinguished from barcode cross-contamination by the presence of reads containing  
243 a wrong combination between an index and a barcode pair. Across all three sequencing runs, we  
244 detected a low proportion of reads with wrong index-barcode combinations (mean=0.594%, SE  $\pm$   
245 0.0434%, Table 1). As detailed in Methods, to obtain the proportion of reads that result from index  
246 hopping, but not from barcode or index cross-contamination, we subtracted our estimates of barcode  
247 cross-contamination and index cross-contamination from this value. The estimated rate of index  
248 hopping in our experiment across all three sequencing runs is therefore 0.470% SE  $\pm$  0.044 (0.594% -  
249  $1.55 \times 10^{-5}$  % - 0.124 %). The proportion of hopped reads differed significantly by sample (chi-square  
250 test,  $P < 10^{-15}$ ). We observed a significant positive correlation between the number of sequenced reads  
251 per sample and the number of reads that hopped from this sample to other samples (Pearson's  $r =$   
252 0.96,  $P = 0.0005$ ), suggesting that samples with higher number of sequenced reads will serve as a  
253 dominant source of hopped reads (Fig. 3). Therefore, even though the overall rate of index hopping is  
254 low, samples with low number of sequenced reads are more affected by index hopping, leading to  
255 1.47% SE  $\pm$  0.11% and 2.49% SE  $\pm$  0.29% of index hopped reads within these samples in our experiment  
256 (e.g. samples 2 and 4 in Table 1, Table S4, Fig. 3).

257 The rate of index hopping differed significantly by read length and GC content (chi-square test,  $P < 10^{-15}$ , Figure 2). Reads shorter than 90 bp and reads with GC content above 40% showed significantly  
258 higher proportion of hopped reads than expected.  
259

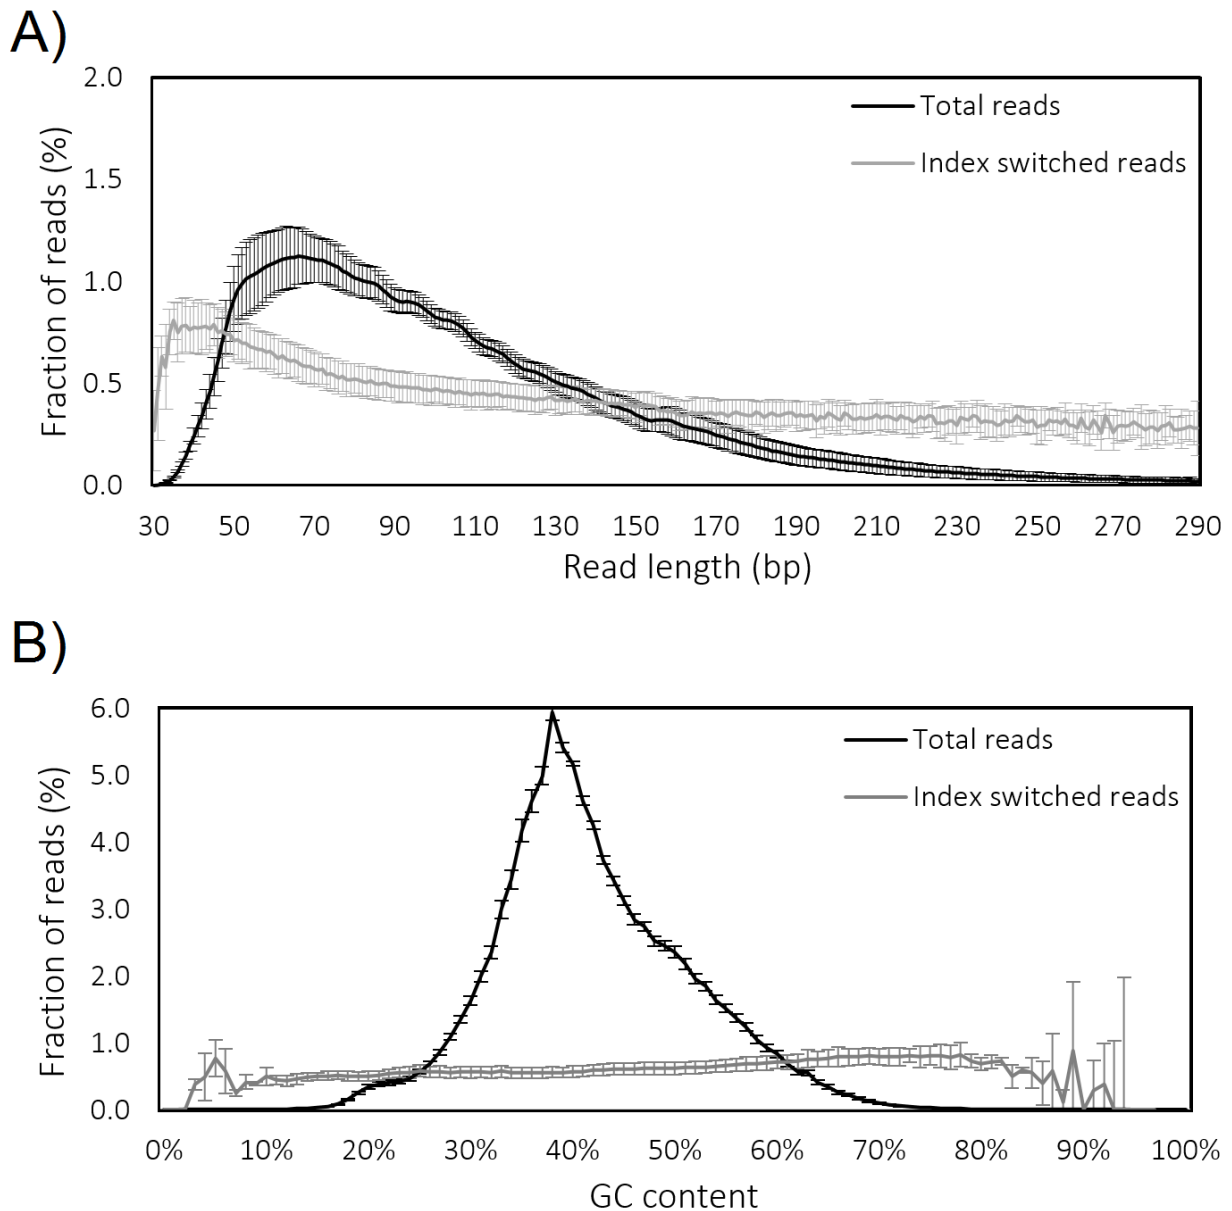

260  
261 *Figure 2: A) Read length distribution and the proportion of index hopping by read length. B) Read GC-*  
262 *content distribution and the proportion of index hopping by read GC content. Vertical bars depict 95%*  
263 *confidence intervals.*

264

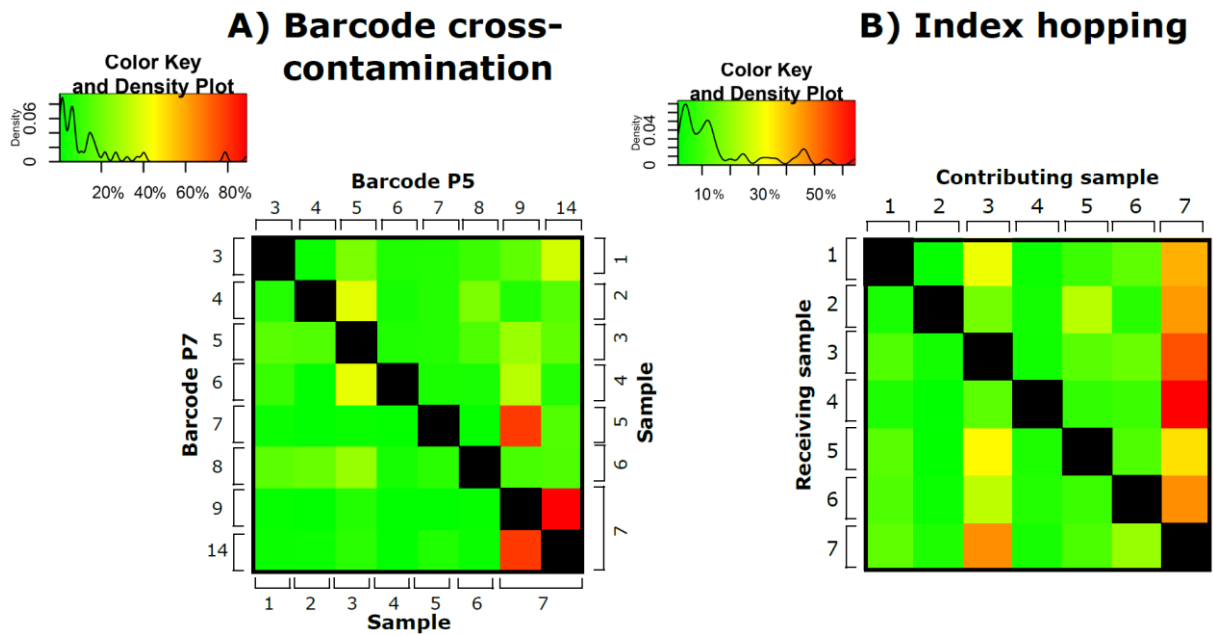

265

266 *Figure 3: Barcode cross contamination and index hopping by sample. A) Proportion of a given wrong*  
 267 *barcode pair in the data out of all erroneous barcode pairs. Barcodes 9 and 14 are paired significantly*  
 268 *more often and at equal frequencies, which is likely explained by jumping PCR. B) Proportions of hopped*  
 269 *reads by sample. Samples in the top row contribute hopped reads, whereas samples on the left receive*  
 270 *hopped reads.*

271

272 *Table 1: Sequencing statistics and estimates of contamination and index hopping.*

| Sample                              | Used P5 Used P7 barcode barcode |       | Original reads (Millions) |       |        | Reads after quality filtering (Millions) |       |        | Reads with wrong barcode pairs (cross-contamination) |        |        | Reads with wrong index-barcode combination |        |         | Cross contaminated reads (%) |        |        | Index hopped reads (%) |        |        |
|-------------------------------------|---------------------------------|-------|---------------------------|-------|--------|------------------------------------------|-------|--------|------------------------------------------------------|--------|--------|--------------------------------------------|--------|---------|------------------------------|--------|--------|------------------------|--------|--------|
|                                     | Run 1                           | Run 2 | Run 3                     | Run 1 | Run 2  | Run 3                                    | Run 1 | Run 2  | Run 3                                                | Run 1  | Run 2  | Run 3                                      | Run 1  | Run 2   | Run 3                        | Run 1  | Run 2  | Run 3                  |        |        |
| 1                                   | 3                               | 3     | 40.63                     | 14.74 | 53.95  | 34.49                                    | 13.01 | 50.43  | 2042                                                 | 971    | 3580   | 158905                                     | 87697  | 280808  | 0.0059                       | 0.0075 | 0.0071 | 0.4587                 | 0.6693 | 0.5538 |
| 2                                   | 4                               | 4     | 11.28                     | 4.83  | 14.16  | 9.80                                     | 4.37  | 13.51  | 1447                                                 | 644    | 1398   | 130125                                     | 77502  | 186512  | 0.0148                       | 0.0147 | 0.0103 | 1.3100                 | 1.7435 | 1.3622 |
| 3                                   | 5                               | 5     | 127.21                    | 44.98 | 157.84 | 104.79                                   | 40.40 | 147.48 | 12939                                                | 4184   | 6937   | 265347                                     | 163502 | 572787  | 0.0123                       | 0.0104 | 0.0047 | 0.2526                 | 0.4031 | 0.3869 |
| 4                                   | 6                               | 6     | 13.80                     | 4.53  | 18.76  | 11.31                                    | 3.88  | 17.05  | 1831                                                 | 865    | 2314   | 262764                                     | 127417 | 349123  | 0.0162                       | 0.0223 | 0.0136 | 2.2700                 | 3.1824 | 2.0061 |
| 5                                   | 7                               | 7     | 22.69                     | 10.27 | 34.67  | 20.00                                    | 9.13  | 32.23  | 7555                                                 | 3676   | 9563   | 166238                                     | 86408  | 308164  | 0.0378                       | 0.0402 | 0.0297 | 0.8245                 | 0.9374 | 0.9472 |
| 6                                   | 8                               | 8     | 30.46                     | 13.57 | 39.58  | 27.56                                    | 12.65 | 38.09  | 2034                                                 | 1245   | 2449   | 78427                                      | 39006  | 161356  | 0.0074                       | 0.0098 | 0.0064 | 0.2838                 | 0.3073 | 0.4219 |
| 7                                   | 9                               | 9     | 125.50                    | 49.63 | 142.72 | 108.26                                   | 44.33 | 130.73 | 63867                                                | 26727  | 62677  | 481435                                     | 256394 | 881862  | 0.0590                       | 0.0603 | 0.0479 | 0.4427                 | 0.5751 | 0.6700 |
| Unidentified                        | -                               | -     | 21.55                     | 9.43  | 33.00  | 14.44                                    | 7.19  | 18.14  | 7860                                                 | 4145   | 5609   | -                                          | -      | -       | 0.0544                       | 0.0576 | 0.0309 | -                      | -      | -      |
| Total                               | -                               | -     | 393                       | 152   | 495    | 331                                      | 135   | 448    | 99575                                                | 42457  | 94527  | 1543241                                    | 837926 | 2740612 | -                            | -      | -      | -                      | -      | -      |
| Average barcode cross-contamination | -                               | -     | -                         | -     | -      | -                                        | -     | -      | 0.0301                                               | 0.0315 | 0.0211 | -                                          | -      | -       | -                            | -      | -      | -                      | -      | -      |
| Average index hopping (%)           | -                               | -     | -                         | -     | -      | -                                        | -     | -      | -                                                    | -      | -      | 0.488                                      | 0.656  | 0.638   | -                            | -      | -      | -                      | -      | -      |

273

274

275

276 **Discussion**

277 We show that index hopping is a real phenomenon occurring on the Illumina HiSeq X platform, but its  
278 rate is below 1% in our study. Multiple sources of error can result in read misassignment on the HiSeq  
279 X platform, including barcode and index cross-contamination, jumping PCR, sequencing errors, and  
280 index hopping. However, through a careful experimental design, we can exclude these error sources  
281 and reliably quantify the rate of index hopping. First, we show that the rate of cross-contamination of  
282 barcodes is very low (on average, only 0.0027%). A slightly higher level of observed barcode cross-  
283 contamination in sample 7 is likely due to jumping-PCR. However, jumping PCR can be eliminated as  
284 explanation for wrong index-barcode combinations, as we prepared all libraries individually and  
285 avoided amplification of pooled libraries from different samples. Library pooling only occurred directly  
286 prior to sequencing. Second, we detect low levels of index cross-contamination by quantifying the  
287 presence of indices that are routinely used in the lab among our sequenced reads (0.124%). This  
288 further suggests that the presence of wrong index-barcode pairs cannot be explained by index cross-  
289 contamination. Third, we employed a very stringent procedure to control for sequencing error: we did  
290 not allow for mismatches in the 7-bp P5 and P7 barcodes, required high average read quality and only  
291 retained merged reads. By using the library preparation protocol as described in Rohland et al. 2015,  
292 we can thus accurately identify and quantify reads containing wrong index-barcode combinations that  
293 are the result of index hopping and not the effect of other sources of error.

294 Read misassignment is not a novel phenomenon for the Illumina sequencing platforms. Reported error  
295 rates range from 0.1% to 0.582% for HiSeq 2500 (Kircher et al. 2012; Wright and Vetsigian 2016a,  
296 Wright and Vetsigian 2016b) and from 0.06% to 0.21% for the MiSeq platforms (Nelson et al. 2014;  
297 D'Amore et al. 2016). It is therefore noteworthy that the fraction of hopped reads as estimated in our  
298 study (0.470%) is similar to that reported for other platforms. However, it markedly differs from the  
299 recent estimates for the Illumina HiSeq X/4000 platforms (Griffiths et al. 2017; Owens et al. 2017; Sinha  
300 et al. 2017). While (Owens et al. 2017) failed to detect any index hopping in libraries sequenced both



301 on Illumina HiSeq X and HiSeq 2500, (Griffiths et al. 2017) and (Sinha et al. 2017) reported >1% and up  
302 to 10% of misassigned reads for single-cell RNA libraries on the HiSeq 4000 platform. Our low observed  
303 rate of index hopping might be explained by the low amounts of free-floating adapters during library  
304 preparation, since these had been rigorously removed through size selection and cleaning (Figure S1).

305

306 The number of reads with hopped indices is proportional to the total number of reads contributed by  
307 a given sample to the pooled sequencing library. Pooling samples in unequal amounts leads to a  
308 greater proportion of hopped reads into samples with fewer sequenced reads. In this study, libraries  
309 with the lowest number of sequenced reads displayed up to 3.2% of misassigned reads (Table 1). When  
310 working with low-quality samples, the effect of unequal amounts of index hopping can become even  
311 more severe if the endogenous content is markedly different between samples, as is often observed  
312 in aDNA studies (Damgaard et al. 2015; Pinhasi et al. 2015; van der Valk et al. 2017). In this case,  
313 hopping of endogenous reads will occur from samples with high endogenous content into samples  
314 with low endogenous content, potentially leading to pronounced biases. The interplay between  
315 endogenous content and the number of sequenced reads may result in libraries, in which the  
316 proportion of false assigned endogenous reads is considerably higher than reported here (Fig. S2).

317

318 Our study shows that while index hopping occurs on the Illumina HiSeq X platform, it results in low  
319 proportion of erroneous reads. Importantly, these reads can be readily identified using a library  
320 preparation protocol that combines two separate inline-barcodes and a unique index (or index pair on  
321 the HiSeq 4000). For studies generating high coverage data, the low detected rate of read  
322 misassignment, which is similar to that of the older sequence platforms, might be insignificant.  
323 However, in cases where low coverage data is generated or absolutely certainty is required, even low-  
324 rate index hopping might represent a major problem. Using short barcode adapters allows for the  
325 filtering of misassigned reads, and in the case of short read lengths (such as in aDNA studies) will lead

326 to only a minimal loss of sequencing data. We therefore recommend the use the 7-bp barcode  
327 adapters when preparing pooled ancient DNA libraries or in studies where absolute certainty is required.

328 **Acknowledgments:**

329 **Funding sources:** This project was supported by FORMAS grant 2015-676 to LD and the Jan Löfqvist  
330 and the Nilsson-Ehle Endowments of the Royal Physiographic Society of Lund to KG. Sequencing  
331 consumables were supplied by Illumina. Illumina had no role in study design, data collection and  
332 analysis, decision to publish or preparation of the manuscript. We also acknowledge the support from  
333 the Science for Life Laboratory, the Knut and Alice Wallenberg Foundation, the National Genomics  
334 Infrastructure funded by the Swedish Research Council, and Uppsala Multidisciplinary Center for  
335 Advanced Computational Science for assistance with massively parallel sequencing and access to the  
336 UPPMAX computational infrastructure.

337

338 **References**

- 339 Allentoft ME, Sikora M, Sjögren K-G, Rasmussen S, Rasmussen M, Stenderup J, Damgaard PB,  
340 Schroeder H, Ahlström T, Vinner L, et al. 2015. Population genomics of Bronze Age Eurasia. *Nature*  
341 **522**: 167–172.
- 342 Caporaso JG, Lauber CL, Walters WA, Berg-Lyons D, Huntley J, Fierer N, Owens SM, Betley J, Fraser L,  
343 Bauer M, et al. 2012. Ultra-high-throughput microbial community analysis on the Illumina HiSeq  
344 and MiSeq platforms. *ISME J* **6**: 1621–1624.
- 345 Craig DW, Pearson J V, Szelinger S, Sekar A, Redman M, Corneveaux JJ, Pawlowski TL, Laub T, Nunn G,  
346 Stephan DA, et al. 2008. Identification of genetic variants using bar-coded multiplexed  
347 sequencing. *Nat Methods* **5**: 887–893.
- 348 D’Amore R, Ijaz UZ, Schirmer M, Kenny JG, Gregory R, Darby AC, Shakya M, Podar M, Quince C, Hall N.  
349 2016. A comprehensive benchmarking study of protocols and sequencing platforms for 16S rRNA  
350 community profiling. *BMC Genomics* **17**: 55.
- 351 Damgaard PB, Margaryan A, Schroeder H, Orlando L, Willerslev E, Allentoft ME. 2015. Improving access  
352 to endogenous DNA in ancient bones and teeth. *Sci Rep* **5**: 11184.
- 353 Flaherty P, Natsoulis G, Muralidharan O, Winters M, Buenrostro J, Bell J, Brown S, Holodniy M, Zhang  
354 N, Ji HP. 2012. Ultrasensitive detection of rare mutations using next-generation targeted  
355 resequencing. *Nucleic Acids Res* **40**: e2–e2.
- 356 Fumagalli M, Vieira FG, Korneliussen TS, Linderoth T, Huerta-Sánchez E, Albrechtsen A, Nielsen R. 2013.  
357 Quantifying population genetic differentiation from next-generation sequencing data. *Genetics*  
358 **195**: 979–992.
- 359 Froenicke L. 2017. Update on barcode mis-assignment issue.  
360 <http://dnatech.genomecenter.ucdavis.edu/2017/04/11/update-on-barcode-mis-assignment->  
361 [issue/](http://dnatech.genomecenter.ucdavis.edu/2017/04/11/update-on-barcode-mis-assignment-)

- 362 Green RE, Krause J, Briggs AW, Maricic T, Stenzel U, Kircher M, Patterson N, Li H, Zhai WW, Fritz MHY,  
363 et al. 2010. A Draft Sequence of the Neandertal Genome. *Science (80- )* **328**: 710–722.
- 364 Greenman C, Stephens P, Smith R, Dalgliesh GL, Hunter C, Bignell G, Davies H, Teague J, Butler A,  
365 Stevens C, et al. 2007. Patterns of somatic mutation in human cancer genomes. *Nature* **446**: 153–  
366 8.
- 367 Griffiths JA, Lun ATL, Richard AC, Bach K, Marioni JC. 2017. Detection and removal of barcode swapping  
368 in single-cell RNA-seq data. *bioRxiv*.
- 369 Holcomb CL, Rastrou M, Williams TC, Goodridge D, Lazaro AM, Tilanus M, Erlich HA. 2014. Next-  
370 generation sequencing can reveal in vitro-generated PCR crossover products: Some artifactual  
371 sequences correspond to HLA alleles in the IMGT/HLA database. *Tissue Antigens* **83**: 32–40.
- 372 Illumina Inc. 2017. *Effects of Index Misassignment on Multiplexing and Downstream Analysis*.
- 373 Kircher M, Sawyer S, Meyer M. 2012. Double indexing overcomes inaccuracies in multiplex sequencing  
374 on the Illumina platform. *Nucleic Acids Res* **40**: e3.
- 375 Lahr DJG, Katz LA. 2009. Reducing the impact of PCR-mediated recombination in molecular evolution  
376 and environmental studies using a new-generation high-fidelity DNA polymerase. *Biotechniques*  
377 **47**: 857–66.
- 378 McDevitt SL, Bredeson J V., Roy SW, Lane JA, Noble JA. 2016. HAPCAD: An open-source tool to detect  
379 PCR crossovers in next-generation sequencing generated HLA data. *Hum Immunol* **77**: 257–263.
- 380 Meyer M, Kircher M. 2010. Illumina sequencing library preparation for highly multiplexed target  
381 capture and sequencing. *Cold Spring Harb Protoc* **5**: pdb.prot5448.
- 382 Meyerhans A, Vartanian JP, Wain-Hobson S. 1990. DNA recombination during PCR. *Nucleic Acids Res*  
383 **18**: 1687–1691.
- 384 Mulligan CJ. 2005. Isolation and Analysis of DNA from Archaeological, Clinical, and Natural History

- 385 Specimens. *Methods Enzymol* **395**: 87–103.
- 386 Nelson MC, Morrison HG, Benjamino J, Grim SL, Graf J. 2014. Analysis, Optimization and Verification  
387 of Illumina-Generated 16S rRNA Gene Amplicon Surveys ed. M.M. Heimesaat. *PLoS One* **9**:  
388 e94249.
- 389 Nielsen R, Korneliussen T, Albrechtsen A, Li Y, Wang J. 2012. SNP calling, genotype calling, and sample  
390 allele frequency estimation from new-generation sequencing data ed. P. Awadalla. *PLoS One* **7**:  
391 e37558.
- 392 Odelberg SJ, Weiss RB, Hata A, White R. 1995. Template-switching during DNA synthesis by *Thermus*  
393 *aquaticus* DNA polymerase I. *Nucleic Acids Res* **23**: 2049–57.
- 394 Owens GL, Todesco M, Drummond EBM, Yeaman S, Rieseberg LH. 2017. A Novel Post Hoc Method For  
395 Detecting Index Switching Finds No Evidence For Increased Switching On The Illumina HiSeq X.  
396 *bioRxiv*.
- 397 Pinhasi R, Fernandes D, Sirak K, Novak M, Connell S, Alpaslan-Roodenberg S, Gerritsen F, Moiseyev V,  
398 Gromov A, Raczky P, et al. 2015. Optimal ancient DNA yields from the inner ear part of the human  
399 petrous bone ed. M.D. Petraglia. *PLoS One* **10**: e0129102.
- 400 Research & Markets. 2017. Market Assessment & Forecast Global Next Generation Sequencing: 2017  
401 – 2021, Report, ID: 4109654, SA-BRC
- 402 Rohland N, Harney E, Mallick S, Nordenfelt S, Reich D. 2015. Partial uracil-DNA-glycosylase treatment  
403 for screening of ancient DNA. *Philos Trans R Soc Lond B Biol Sci* **370**: 20130624.
- 404 Rohland N, Reich D. 2012. Cost-effective, high-throughput DNA sequencing libraries for multiplexed  
405 target capture. *Genome Res* **22**: 939–946.
- 406 Sawyer S, Krause J, Guschanski K, Savolainen V, Paabo S. 2012. Temporal patterns of nucleotide  
407 misincorporations and DNA fragmentation in ancient DNA. *PLoS One* **7**: e34131.

- 408 Schmieder R, Edwards R. 2011. Quality control and preprocessing of metagenomic datasets.  
409 *Bioinformatics* **27**: 863–864.
- 410 Schmitt MW, Kennedy SR, Salk JJ, Fox EJ, Hiatt JB, Loeb LA. 2012. Detection of ultra-rare mutations by  
411 next-generation sequencing. *Proc Natl Acad Sci U S A* **109**: 14508–13.
- 412 Schubert M, Lindgreen S, Orlando L. 2016. AdapterRemoval v2: rapid adapter trimming, identification,  
413 and read merging. *BMC Res Notes* **9**: 88.
- 414 Sinha R, Stanley G, Gulati GS, Ezran C, Travaglini KJ, Wei E, Chan CKF, Nabhan AN, Su T, Morganti RM,  
415 et al. 2017. Index Switching Causes “Spreading-Of-Signal” Among Multiplexed Samples In Illumina  
416 HiSeq 4000 DNA Sequencing. *bioRxiv*.
- 417 Smith AM, Heisler LE, St.Onge RP, Farias-Hesson E, Wallace IM, Bodeau J, Harris AN, Perry KM, Giaever  
418 G, Pourmand N, et al. 2010. Highly-multiplexed barcode sequencing: an efficient method for  
419 parallel analysis of pooled samples. *Nucleic Acids Res* **38**: e142–e142.
- 420 Team R Core. 2016. R: A language and environment for statistical computing. R Foundation for  
421 Statistical Computing, Vienna, Austria. ISBN 3-900051-07-0, URL <http://www.R-project.org/>.
- 422 Therkildsen NO, Palumbi SR. 2017. Practical low-coverage genomewide sequencing of hundreds of  
423 individually barcoded samples for population and evolutionary genomics in nonmodel species.  
424 *Mol Ecol Resour* **17**: 194–208.
- 425 Trapnell C, Hendrickson DG, Sauvageau M, Goff L, Rinn JL, Pachter L. 2013. Differential analysis of gene  
426 regulation at transcript resolution with RNA-seq. *Nat Biotechnol* **31**: 46–53.
- 427 van der Valk T, Lona Durazo F, Dalén L, Guschanski K. 2017. Whole mitochondrial genome capture from  
428 faecal samples and museum-preserved specimens. *Mol Ecol Resour*.
- 429 Wall JD, Schlebusch SA, Alberts SC, Cox LA, Snyder-Mackler N, Nevonen KA, Carbone L, Tung J. 2016.  
430 Genomewide ancestry and divergence patterns from low-coverage sequencing data reveal a

- 431 complex history of admixture in wild baboons. *Mol Ecol* **25**: 3469–3483.
- 432 Wright ES, Vetsigian KH. 2016a. Inhibitory interactions promote frequent bistability among competing  
433 bacteria. *Nat Commun* **7**: 11274.
- 434 Wright ES, Vetsigian KH. 2016b. Quality filtering of Illumina index reads mitigates sample cross-talk.  
435 *BMC Genomics* **17**: 876.
- 436
- 437

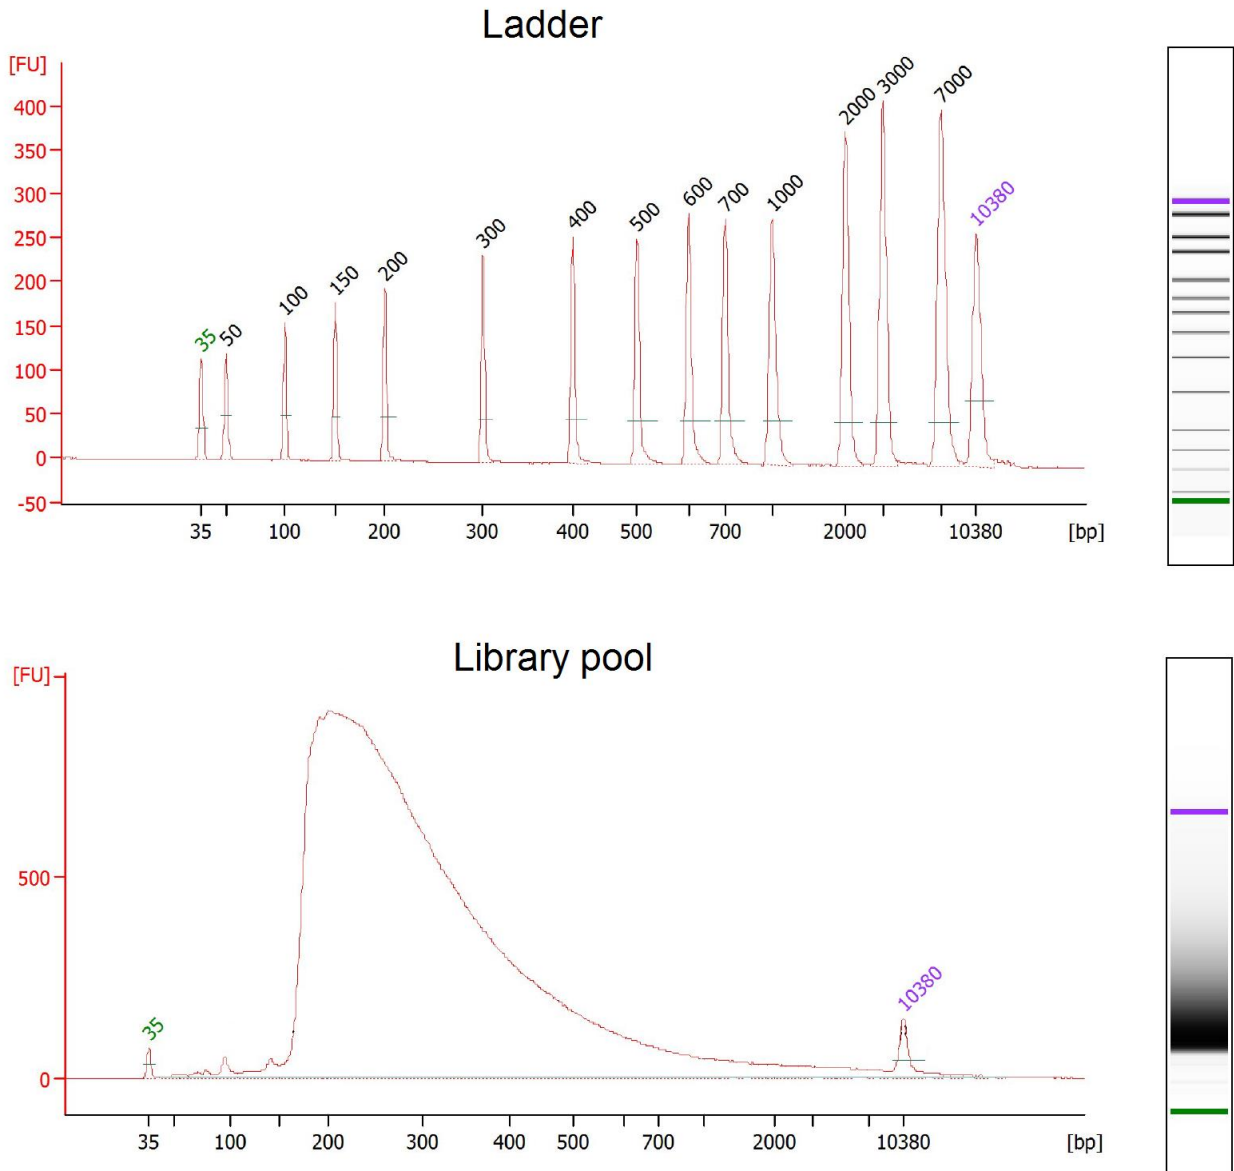

438

439 *Figure S1: Bioanalyzer profile of the final pooled library. Note that during library preparation,*  
440 *sequencing adapters are attached to the DNA fragments, adding an additional 136 bp to the original*  
441 *DNA fragments. The insert size of the DNA is therefore 136 bp lower than what the Bioanalyzer shows.*

442

443



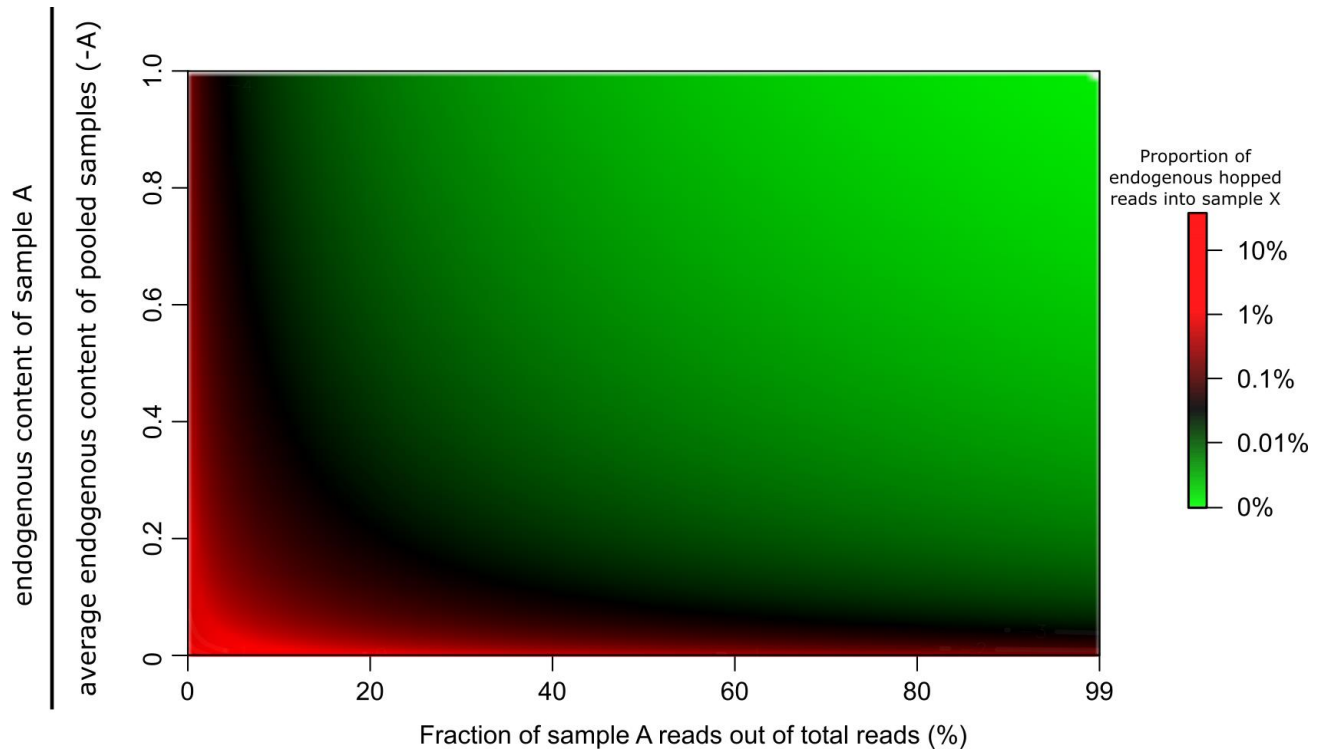

444

445 *Figure S2. Theoretical relationship between endogenous content, fraction of total reads contributed by*  
446 *a given sample (referred to as sample X) to the pooled sequencing library, and index hopping. The lower*  
447 *the proportion of reads in sample X and the lower its endogenous content compared to other samples*  
448 *in the pooled sequencing library, the higher the proportion of endogenous hopped reads that sample X*  
449 *will receive from other samples.*

450

451 *Table S1, oligonucleotide sequence of the used barcodes and indices*

| Barcode and primer sequences from Rohland et al. (2015) |                  |                                   |                                          |                 |
|---------------------------------------------------------|------------------|-----------------------------------|------------------------------------------|-----------------|
| ID                                                      | Barcode sequence | P5.F (5'→3')                      | P7.F (5'→3')                             | P5/P7.R (5'→3') |
| 3                                                       | GCTAGCC          | CTTTCCTACACGACGCTCTCCGATCTgctagcc | GTGACTGGAGTTCAGACGTGTGCTCTCCGATCTgctagcc | ggctagcAGATCG   |
| 4                                                       | TGACTGG          | CTTTCCTACACGACGCTCTCCGATCTgactgg  | GTGACTGGAGTTCAGACGTGTGCTCTCCGATCTgactgg  | ccagtcaAGATCG   |
| 5                                                       | CAATTGC          | CTTTCCTACACGACGCTCTCCGATCTcaattgc | GTGACTGGAGTTCAGACGTGTGCTCTCCGATCTcaattgc | gcaattgAGATCG   |
| 6                                                       | GCCAAATG         | CTTTCCTACACGACGCTCTCCGATCTgccaatg | GTGACTGGAGTTCAGACGTGTGCTCTCCGATCTgccaatg | cattggcAGATCG   |
| 7                                                       | TGGCCAT          | CTTTCCTACACGACGCTCTCCGATCTggccat  | GTGACTGGAGTTCAGACGTGTGCTCTCCGATCTggccat  | atggccaAGATCG   |
| 8                                                       | ATTGGCA          | CTTTCCTACACGACGCTCTCCGATCTattggca | GTGACTGGAGTTCAGACGTGTGCTCTCCGATCTattggca | tgccaatAGATCG   |
| 9                                                       | CGATGTA          | CTTTCCTACACGACGCTCTCCGATCTcgatgta | GTGACTGGAGTTCAGACGTGTGCTCTCCGATCTcgatgta | tacatcgAGATCG   |
| 14                                                      | TTACAGT          | CTTTCCTACACGACGCTCTCCGATCTttacagt | GTGACTGGAGTTCAGACGTGTGCTCTCCGATCTttacagt | actgtaaAGATCG   |

| Indexing primers from Meyer et al. 2010 used in this experiment |                |                                                        |
|-----------------------------------------------------------------|----------------|--------------------------------------------------------|
| Index ID                                                        | Index sequence | 5'→3'                                                  |
| P7_index_1                                                      | AATCTTC        | CAAGCAGAAGACGGCATAACGAGATgaagattGTGACTGGAGTTCAGACGTGT  |
| P7_index_2                                                      | ACCAACG        | CAAGCAGAAGACGGCATAACGAGATcgttggGTGACTGGAGTTCAGACGTGT   |
| P7_index_3                                                      | AGATGGC        | CAAGCAGAAGACGGCATAACGAGATgccatctGTGACTGGAGTTCAGACGTGT  |
| P7_index_4                                                      | CCAGGTT        | CAAGCAGAAGACGGCATAACGAGATaacctggGTGACTGGAGTTCAGACGTGT  |
| P7_index_5                                                      | CCGTTAG        | CAAGCAGAAGACGGCATAACGAGATctaaccggGTGACTGGAGTTCAGACGTGT |
| P7_index_6                                                      | CGCCTCT        | CAAGCAGAAGACGGCATAACGAGATagagcggGTGACTGGAGTTCAGACGTGT  |
| P7_index_7                                                      | CTTGCGG        | CAAGCAGAAGACGGCATAACGAGATccgcaagGTGACTGGAGTTCAGACGTGT  |

452

453

454 *Table S2, Barcode cross-contamination. Sample on the left is the receiving sample, sample on top is*  
 455 *the contributing sample.*

Counts for the observed barcode cross contamination combinations

|            |    | Run 1      |      |      |     |      |     |      |      |       |
|------------|----|------------|------|------|-----|------|-----|------|------|-------|
|            |    | P7 barcode |      |      |     |      |     |      |      |       |
|            |    | 3          | 4    | 5    | 6   | 7    | 8   | 9    | 14   |       |
| P5 barcode | 3  |            |      | 85   | 810 | 204  | 280 | 192  | 616  | 1184  |
|            | 4  | 117        |      |      | 523 | 51   | 66  | 302  | 77   | 132   |
|            | 5  | 1211       | 1145 |      |     | 536  | 642 | 1357 | 1479 | 1241  |
|            | 6  | 239        | 22   | 864  |     |      | 166 | 86   | 641  | 154   |
|            | 7  | 339        | 29   | 183  | 156 |      |     | 148  | 7983 | 1409  |
|            | 8  | 272        | 399  | 653  | 75  | 184  |     |      | 180  | 221   |
|            | 9  | 812        | 127  | 1579 | 271 | 263  | 449 |      |      | 29276 |
|            | 14 | 1004       | 390  | 1374 | 328 | 1269 | 565 |      |      | 24558 |

Percentage of reads containing a given barcode combination out of total cross-contaminated reads containing this barcode

|            |    | Run 1      |       |       |       |      |      |       |       |       |
|------------|----|------------|-------|-------|-------|------|------|-------|-------|-------|
|            |    | P7 barcode |       |       |       |      |      |       |       |       |
|            |    | 3          | 4     | 5     | 6     | 7    | 8    | 9     | 14    |       |
| P5 barcode | 3  |            |       | 2.52  | 24.03 | 6.05 | 8.31 | 5.70  | 18.27 | 35.12 |
|            | 4  | 9.23       |       |       | 41.25 | 4.02 | 5.21 | 23.82 | 6.07  | 10.41 |
|            | 5  | 15.91      | 15.04 |       |       | 7.04 | 8.44 | 17.83 | 19.43 | 16.31 |
|            | 6  | 11.00      | 1.01  | 39.78 |       |      | 7.64 | 3.96  | 29.51 | 7.09  |
|            | 7  | 3.31       | 0.28  | 1.79  | 1.52  |      |      | 1.44  | 77.91 | 13.75 |
|            | 8  | 13.71      | 20.11 | 32.91 | 3.78  | 9.27 |      |       | 9.07  | 11.14 |
|            | 9  | 2.48       | 0.39  | 4.82  | 0.83  | 0.80 | 1.37 |       |       | 89.32 |
|            | 14 | 3.40       | 1.32  | 4.66  | 1.11  | 4.30 | 1.92 |       |       | 83.28 |

Counts for the observed barcode cross contamination combinations

|            |    | Run 2      |     |     |     |     |     |       |       |
|------------|----|------------|-----|-----|-----|-----|-----|-------|-------|
|            |    | P7 barcode |     |     |     |     |     |       |       |
|            |    | 3          | 4   | 5   | 6   | 7   | 8   | 9     | 14    |
| P5 barcode | 3  |            | 13  | 170 | 53  | 58  | 124 | 152   | 346   |
|            | 4  | 33         |     | 224 | 23  | 39  | 121 | 30    | 51    |
|            | 5  | 632        | 775 |     | 242 | 321 | 632 | 1466  | 566   |
|            | 6  | 62         | 5   | 344 |     | 30  | 46  | 274   | 34    |
|            | 7  | 60         | 9   | 72  | 45  |     | 53  | 3134  | 582   |
|            | 8  | 142        | 159 | 202 | 44  | 68  |     | 139   | 148   |
|            | 9  | 181        | 41  | 600 | 79  | 132 | 249 |       | 12760 |
|            | 14 | 271        | 169 | 738 | 152 | 781 | 357 | 10079 |       |

Percentage of reads containing a given barcode combination out of total cross-contaminated reads containing this barcode

|            |    | Run 2      |       |       |      |      |       |       |       |
|------------|----|------------|-------|-------|------|------|-------|-------|-------|
|            |    | P7 barcode |       |       |      |      |       |       |       |
|            |    | 3          | 4     | 5     | 6    | 7    | 8     | 9     | 14    |
| P5 barcode | 3  |            | 1.42  | 18.56 | 5.79 | 6.33 | 13.54 | 16.59 | 37.77 |
|            | 4  | 6.33       |       | 42.99 | 4.41 | 7.49 | 23.22 | 5.76  | 9.79  |
|            | 5  | 13.64      | 16.72 |       | 5.22 | 6.93 | 13.64 | 31.64 | 12.21 |
|            | 6  | 7.80       | 0.63  | 43.27 |      | 3.77 | 5.79  | 34.47 | 4.28  |
|            | 7  | 1.52       | 0.23  | 1.82  | 1.14 |      | 1.34  | 79.24 | 14.72 |
|            | 8  | 15.74      | 17.63 | 22.39 | 4.88 | 7.54 |       | 15.41 | 16.41 |
|            | 9  | 1.29       | 0.29  | 4.27  | 0.56 | 0.94 | 1.77  |       | 90.87 |
|            | 14 | 2.16       | 1.35  | 5.88  | 1.21 | 6.22 | 2.85  |       | 80.33 |

Counts for the observed barcode cross contamination combinations

|            |    | Run 3      |      |      |     |      |      |       |       |
|------------|----|------------|------|------|-----|------|------|-------|-------|
|            |    | P7 barcode |      |      |     |      |      |       |       |
|            |    | 3          | 4    | 5    | 6   | 7    | 8    | 9     | 14    |
| P5 barcode | 3  |            | 46   | 462  | 105 | 95   | 260  | 320   | 793   |
|            | 4  | 62         |      | 472  | 54  | 97   | 249  | 86    | 329   |
|            | 5  | 2488       | 1651 |      | 730 | 632  | 1458 | 4458  | 3313  |
|            | 6  | 222        | 17   | 699  |     | 63   | 73   | 591   | 146   |
|            | 7  | 140        | 29   | 157  | 77  |      | 79   | 6606  | 1279  |
|            | 8  | 291        | 270  | 374  | 69  | 101  |      | 215   | 221   |
|            | 9  | 354        | 85   | 2894 | 158 | 243  | 382  |       | 25950 |
|            | 14 | 476        | 1453 | 3744 | 334 | 2024 | 605  | 23134 |       |

Percentage of reads containing a given barcode combination out of total cross-contaminated reads containing this barcode

|            |    | Run 3      |       |       |      |      |       |       |       |
|------------|----|------------|-------|-------|------|------|-------|-------|-------|
|            |    | P7 barcode |       |       |      |      |       |       |       |
|            |    | 3          | 4     | 5     | 6    | 7    | 8     | 9     | 14    |
| P5 barcode | 3  |            | 2.21  | 22.20 | 5.05 | 4.57 | 12.49 | 15.38 | 38.11 |
|            | 4  | 4.60       |       | 34.99 | 4.00 | 7.19 | 18.46 | 6.38  | 24.39 |
|            | 5  | 16.89      | 11.21 |       | 4.96 | 4.29 | 9.90  | 30.26 | 22.49 |
|            | 6  | 12.26      | 0.94  | 38.60 |      | 3.48 | 4.03  | 32.63 | 8.06  |
|            | 7  | 1.67       | 0.35  | 1.88  | 0.92 |      | 0.94  | 78.95 | 15.29 |
|            | 8  | 18.88      | 17.52 | 24.27 | 4.48 | 6.55 |       | 13.95 | 14.34 |
|            | 9  | 1.18       | 0.28  | 9.63  | 0.53 | 0.81 | 1.27  |       | 86.31 |
|            | 14 | 1.50       | 4.57  | 11.78 | 1.05 | 6.37 | 1.90  |       | 72.82 |

456

457

458 *Table S3, Indexing primers from Meyer et al. 2010 which are handled in the aDNA lab but not used in*  
 459 *this study and the number of reads containing the respective index per run*

| Index ID     | Oligo sequence (5'-3') (index marked with small letters) | Index sequence (5'-3') | Reads with respective index |       |        |
|--------------|----------------------------------------------------------|------------------------|-----------------------------|-------|--------|
|              |                                                          |                        | Run 1                       | Run 2 | Run 3  |
| P7_index_8   | CAAGCAGAAGACGGCATAACGAGATtccgagcGTGACTGGAGTTCAGACGTGT    | GCTCGAA                | 5348                        | 1931  | 7126   |
| P7_index_9   | CAAGCAGAAGACGGCATAACGAGATagttggtGTGACTGGAGTTCAGACGTGT    | ACCAACT                | 112581                      | 47853 | 149981 |
| P7_index_10  | CAAGCAGAAGACGGCATAACGAGATgtaccggGTGACTGGAGTTCAGACGTGT    | CCGGTAC                | 4733                        | 1861  | 6352   |
| P7_index_11  | CAAGCAGAAGACGGCATAACGAGATcggagttGTGACTGGAGTTCAGACGTGT    | AACTCCG                | 1521                        | 586   | 2081   |
| P7_index_12  | CAAGCAGAAGACGGCATAACGAGATactcaaGTGACTGGAGTTCAGACGTGT     | TTGAAGT                | 10938                       | 4811  | 14492  |
| P7_index_13  | CAAGCAGAAGACGGCATAACGAGATgatagtGTGACTGGAGTTCAGACGTGT     | ACTATCA                | 1860                        | 751   | 2672   |
| P7_index_14  | CAAGCAGAAGACGGCATAACGAGATgatcaaGTGACTGGAGTTCAGACGTGT     | TTGGATC                | 3734                        | 1673  | 5052   |
| P7_index_15  | CAAGCAGAAGACGGCATAACGAGATcagatcgGTGACTGGAGTTCAGACGTGT    | CGACCTG                | 7975                        | 3037  | 10605  |
| P7_index_16  | CAAGCAGAAGACGGCATAACGAGATcgcattaGTGACTGGAGTTCAGACGTGT    | TAATGCG                | 20306                       | 8057  | 29426  |
| P7_index_17  | CAAGCAGAAGACGGCATAACGAGATggtacctGTGACTGGAGTTCAGACGTGT    | AGGTACC                | 9312                        | 3633  | 12493  |
| P7_index_18  | CAAGCAGAAGACGGCATAACGAGATggagcgaGTGACTGGAGTTCAGACGTGT    | TGCGTCC                | 19341                       | 7288  | 25033  |
| P7_index_19  | CAAGCAGAAGACGGCATAACGAGATgagattcGTGACTGGAGTTCAGACGTGT    | GAATCTC                | 3421                        | 1068  | 4663   |
| P7_index_20  | CAAGCAGAAGACGGCATAACGAGATgagcatgGTGACTGGAGTTCAGACGTGT    | CATGCTC                | 157222                      | 53466 | 216544 |
| P7_index_21  | CAAGCAGAAGACGGCATAACGAGATgttcggtGTGACTGGAGTTCAGACGTGT    | ACGCAAC                | 11657                       | 4692  | 14907  |
| P7_index_22  | CAAGCAGAAGACGGCATAACGAGATccaatgcGTGACTGGAGTTCAGACGTGT    | GCATTGG                | 28894                       | 10347 | 42820  |
| P7_index_23  | CAAGCAGAAGACGGCATAACGAGATcgagatcGTGACTGGAGTTCAGACGTGT    | GATCTCG                | 464                         | 152   | 901    |
| P7_index_24  | CAAGCAGAAGACGGCATAACGAGATcatattgGTGACTGGAGTTCAGACGTGT    | CAATATG                | 1                           | 2     | 13     |
| P7_index_25  | CAAGCAGAAGACGGCATAACGAGATgacgtcaGTGACTGGAGTTCAGACGTGT    | TGACGTC                | 5                           | 1     | 8      |
| P7_index_26  | CAAGCAGAAGACGGCATAACGAGATggcatcGTGACTGGAGTTCAGACGTGT     | GATGCCA                | 22                          | 3     | 29     |
| P7_index_27  | CAAGCAGAAGACGGCATAACGAGATgtaattgGTGACTGGAGTTCAGACGTGT    | CAATTAC                | 35                          | 14    | 284    |
| P7_index_28  | CAAGCAGAAGACGGCATAACGAGATcctatctGTGACTGGAGTTCAGACGTGT    | AGATAGG                | 1                           | 0     | 5      |
| P7_index_29  | CAAGCAGAAGACGGCATAACGAGATcaatcggGTGACTGGAGTTCAGACGTGT    | CCGATTG                | 354                         | 90    | 244    |
| P7_index_30  | CAAGCAGAAGACGGCATAACGAGATcggcatGTGACTGGAGTTCAGACGTGT     | ATGCCGC                | 31                          | 39    | 331    |
| P7_index_31  | CAAGCAGAAGACGGCATAACGAGATagtactgGTGACTGGAGTTCAGACGTGT    | CAGTACT                | 0                           | 0     | 0      |
| P7_index_32  | CAAGCAGAAGACGGCATAACGAGATtactattGTGACTGGAGTTCAGACGTGT    | AATAGTA                | 56                          | 21    | 11     |
| P7_index_193 | CAAGCAGAAGACGGCATAACGAGATcaacctcGTGACTGGAGTTCAGACGTGT    | GAGGTTG                | 137                         | 6     | 51     |
| P7_index_194 | CAAGCAGAAGACGGCATAACGAGATactcataGTGACTGGAGTTCAGACGTGT    | TATGAGT                | 7                           | 2     | 3      |
| P7_index_195 | CAAGCAGAAGACGGCATAACGAGATaacgaagGTGACTGGAGTTCAGACGTGT    | CTTCGTT                | 798                         | 213   | 151    |
| P7_index_196 | CAAGCAGAAGACGGCATAACGAGATcggacggGTGACTGGAGTTCAGACGTGT    | CCGTCCG                | 12                          | 4     | 22     |
| P7_index_197 | CAAGCAGAAGACGGCATAACGAGATaacgttGTGACTGGAGTTCAGACGTGT     | AACGTTA                | 73                          | 20    | 62     |
| P7_index_198 | CAAGCAGAAGACGGCATAACGAGATaatatgcGTGACTGGAGTTCAGACGTGT    | GCATATT                | 2                           | 4     | 9      |
| P7_index_199 | CAAGCAGAAGACGGCATAACGAGATggaaggtGTGACTGGAGTTCAGACGTGT    | ACCTTCC                | 26                          | 9     | 282    |
| P7_index_200 | CAAGCAGAAGACGGCATAACGAGATctcggaaGTGACTGGAGTTCAGACGTGT    | TTCCGAG                | 27                          | 16    | 8      |

460

461 *Table S4, Index hopped reads. Sample on the left is the receiving sample, sample on top is the*  
 462 *contributing sample.*

Index hopped reads (absolute read count)

| Run 1    |          |          |          |          |          |          |          |
|----------|----------|----------|----------|----------|----------|----------|----------|
|          | Sample 1 | Sample 2 | Sample 3 | Sample 4 | Sample 5 | Sample 6 | Sample 7 |
| Sample 1 |          | 2727     | 49532    | 4381     | 12904    | 18797    | 70564    |
| Sample 2 | 5088     |          | 19135    | 5173     | 31311    | 7378     | 62040    |
| Sample 3 | 29090    | 9081     |          | 9348     | 32066    | 37179    | 148583   |
| Sample 4 | 11292    | 2993     | 30318    |          | 18709    | 21484    | 177968   |
| Sample 5 | 20233    | 2826     | 52297    | 8077     |          | 16747    | 66058    |
| Sample 6 | 8383     | 2141     | 18866    | 4888     | 6769     |          | 37380    |
| Sample 7 | 64580    | 23698    | 230951   | 21080    | 48316    | 92810    |          |

Percentage of hopped reads out of total hopped reads

| Run 1    |          |          |          |          |          |          |          |
|----------|----------|----------|----------|----------|----------|----------|----------|
|          | Sample 1 | Sample 2 | Sample 3 | Sample 4 | Sample 5 | Sample 6 | Sample 7 |
| Sample 1 |          | 6.27     | 12.35    | 8.27     | 8.60     | 9.67     | 12.54    |
| Sample 2 | 3.67     |          | 4.77     | 9.77     | 20.86    | 3.80     | 11.03    |
| Sample 3 | 20.98    | 20.89    |          | 17.66    | 21.37    | 19.13    | 26.41    |
| Sample 4 | 8.14     | 6.89     | 7.56     |          | 12.47    | 11.05    | 31.63    |
| Sample 5 | 14.59    | 6.50     | 13.04    | 15.25    |          | 8.61     | 11.74    |
| Sample 6 | 6.05     | 4.93     | 4.70     | 9.23     | 4.51     |          | 6.64     |
| Sample 7 | 46.57    | 54.52    | 57.58    | 39.81    | 32.19    | 47.74    |          |

Run 2

| Run 2    |          |          |          |          |          |          |          |
|----------|----------|----------|----------|----------|----------|----------|----------|
|          | Sample 1 | Sample 2 | Sample 3 | Sample 4 | Sample 5 | Sample 6 | Sample 7 |
| Sample 1 |          | 1191     | 23399    | 2386     | 8643     | 13576    | 38502    |
| Sample 2 | 3098     |          | 12342    | 2503     | 16405    | 5424     | 37730    |
| Sample 3 | 14989    | 4392     |          | 4720     | 22662    | 21745    | 94994    |
| Sample 4 | 6572     | 1759     | 16249    |          | 11376    | 12195    | 79266    |
| Sample 5 | 8679     | 1185     | 31446    | 4569     |          | 9975     | 30554    |
| Sample 6 | 4205     | 866      | 7019     | 2120     | 3831     |          | 20965    |
| Sample 7 | 31484    | 11790    | 115066   | 10011    | 29857    | 58186    |          |

Run 2

| Run 2    |          |          |          |          |          |          |          |
|----------|----------|----------|----------|----------|----------|----------|----------|
|          | Sample 1 | Sample 2 | Sample 3 | Sample 4 | Sample 5 | Sample 6 | Sample 7 |
| Sample 1 |          | 5.62     | 11.39    | 9.07     | 9.32     | 11.21    | 12.75    |
| Sample 2 | 4.49     |          | 6.01     | 9.51     | 17.68    | 4.48     | 12.49    |
| Sample 3 | 21.71    | 20.73    |          | 17.94    | 24.43    | 17.96    | 31.45    |
| Sample 4 | 9.52     | 8.30     | 7.91     |          | 12.26    | 10.07    | 26.25    |
| Sample 5 | 12.57    | 5.59     | 15.30    | 17.37    |          | 8.24     | 10.12    |
| Sample 6 | 6.09     | 4.09     | 3.42     | 8.06     | 4.13     |          | 6.94     |
| Sample 7 | 45.61    | 55.66    | 55.99    | 38.05    | 32.18    | 48.05    |          |

Run 3

| Run 3    |          |          |          |          |          |          |          |
|----------|----------|----------|----------|----------|----------|----------|----------|
|          | Sample 1 | Sample 2 | Sample 3 | Sample 4 | Sample 5 | Sample 6 | Sample 7 |
| Sample 1 |          | 8536     | 96273    | 9467     | 22791    | 33267    | 110474   |
| Sample 2 | 9502     |          | 31538    | 7841     | 51120    | 12393    | 74118    |
| Sample 3 | 79602    | 29426    |          | 26470    | 62995    | 93300    | 280994   |
| Sample 4 | 17495    | 5672     | 50783    |          | 24483    | 30048    | 220642   |
| Sample 5 | 44772    | 8938     | 100035   | 14343    |          | 34682    | 105394   |
| Sample 6 | 18443    | 6711     | 52288    | 8974     | 13100    |          | 61840    |
| Sample 7 | 126548   | 49226    | 414703   | 41078    | 91523    | 158784   |          |

Run 3

| Run 3    |          |          |          |          |          |          |          |
|----------|----------|----------|----------|----------|----------|----------|----------|
|          | Sample 1 | Sample 2 | Sample 3 | Sample 4 | Sample 5 | Sample 6 | Sample 7 |
| Sample 1 |          | 7.87     | 12.91    | 8.75     | 8.57     | 9.18     | 8.46     |
| Sample 2 | 3.21     |          | 4.23     | 7.25     | 19.22    | 3.42     | 5.67     |
| Sample 3 | 26.86    | 27.12    |          | 24.47    | 23.68    | 25.74    | 21.51    |
| Sample 4 | 5.90     | 5.23     | 6.81     |          | 9.20     | 8.29     | 16.89    |
| Sample 5 | 15.11    | 8.24     | 13.42    | 13.26    |          | 9.57     | 8.07     |
| Sample 6 | 6.22     | 6.18     | 7.01     | 8.30     | 4.92     |          | 4.73     |
| Sample 7 | 42.70    | 45.37    | 55.62    | 37.97    | 34.41    | 43.81    |          |

463
